# Supplementary figures and images for: Differences in Chemical Constituents between Dalbergia oliveri Heartwood and Sapwood and Their Effect on Wood Color
Source: MDPI journal article supplement (doi:10.3390/molecules27227978), 2022-11-17

Supplemental Figure: Structural identification of flavonoid components in *D. oliveri*

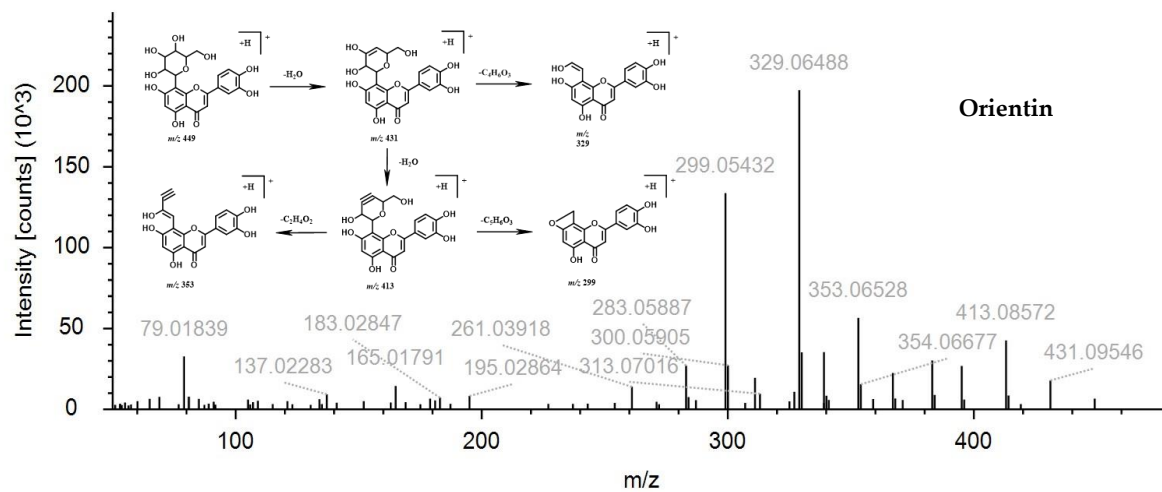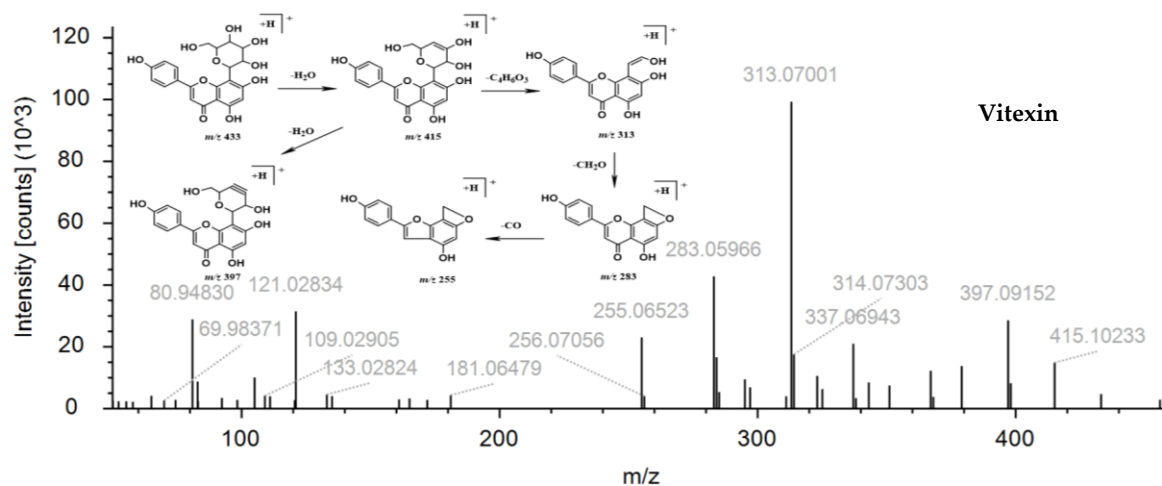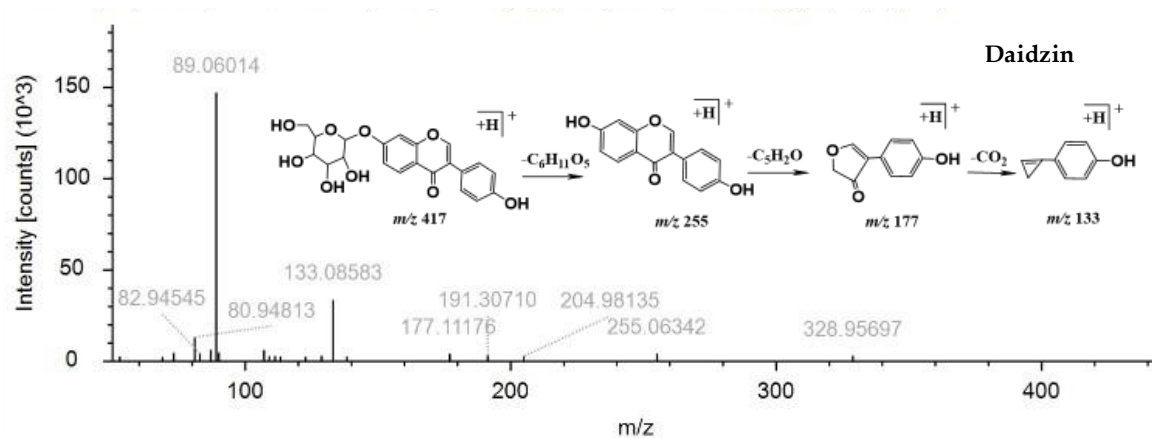

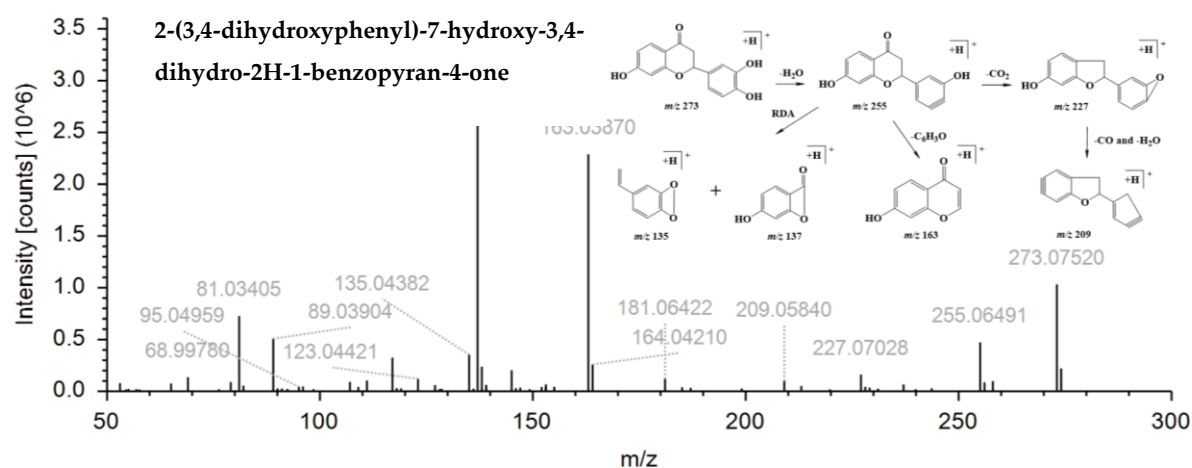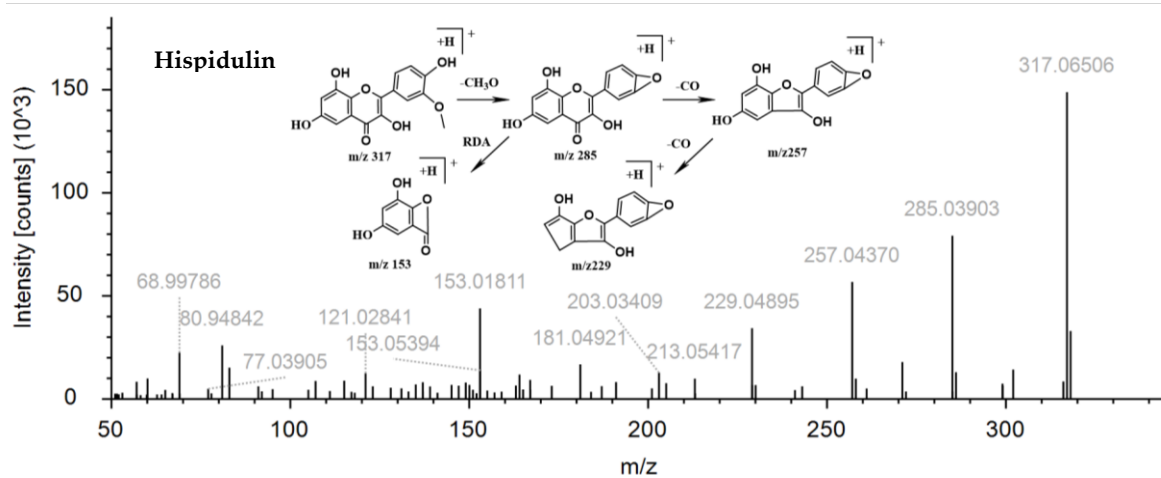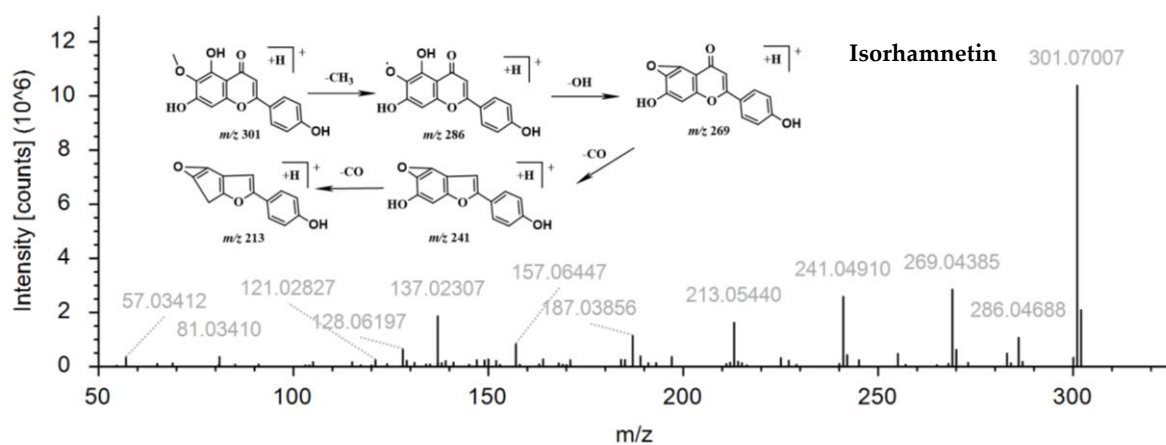

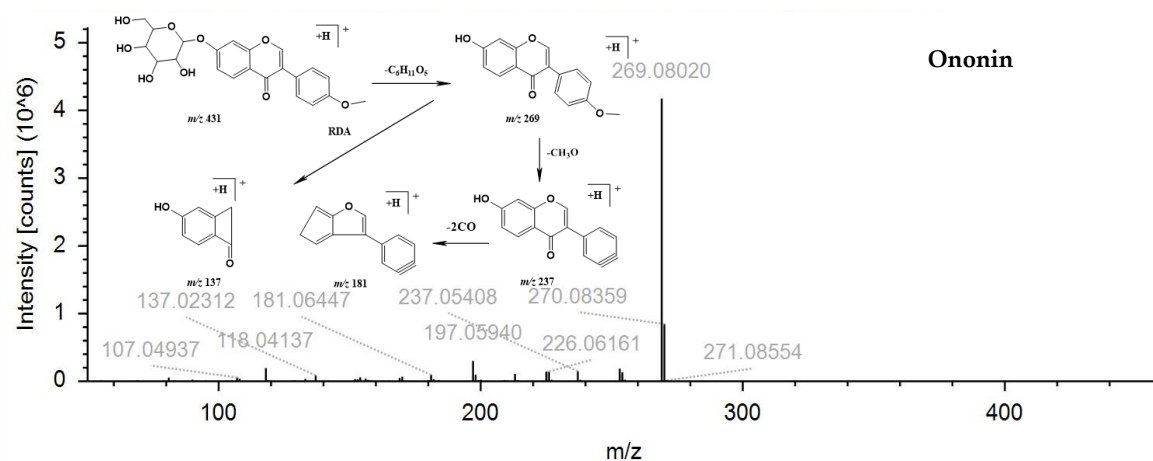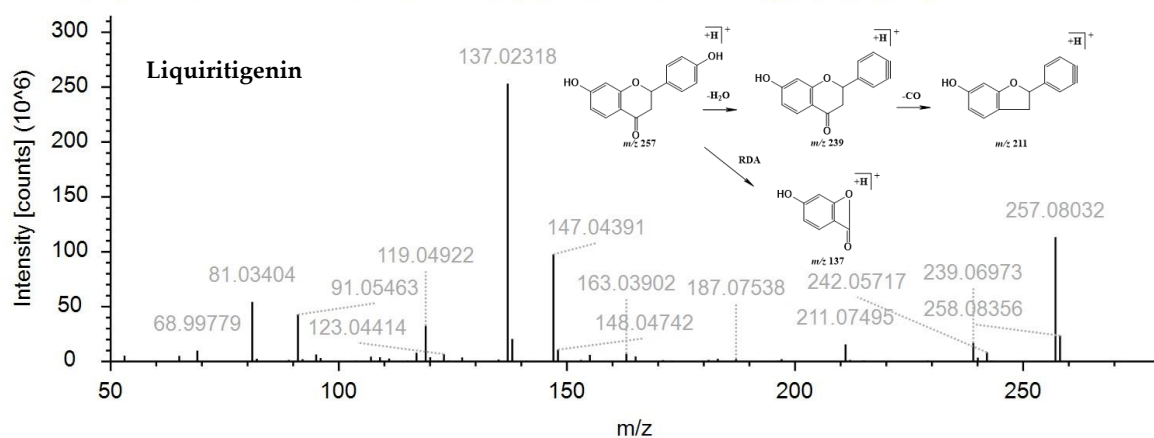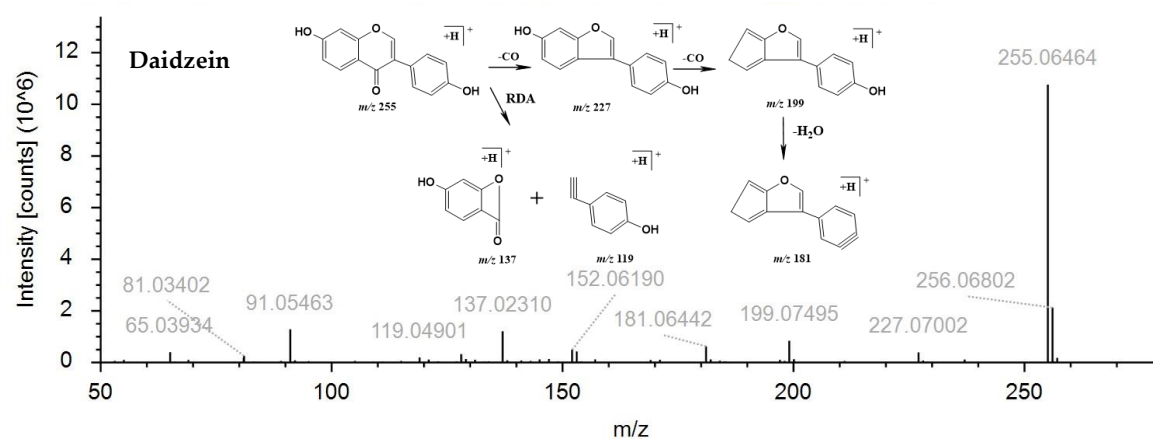

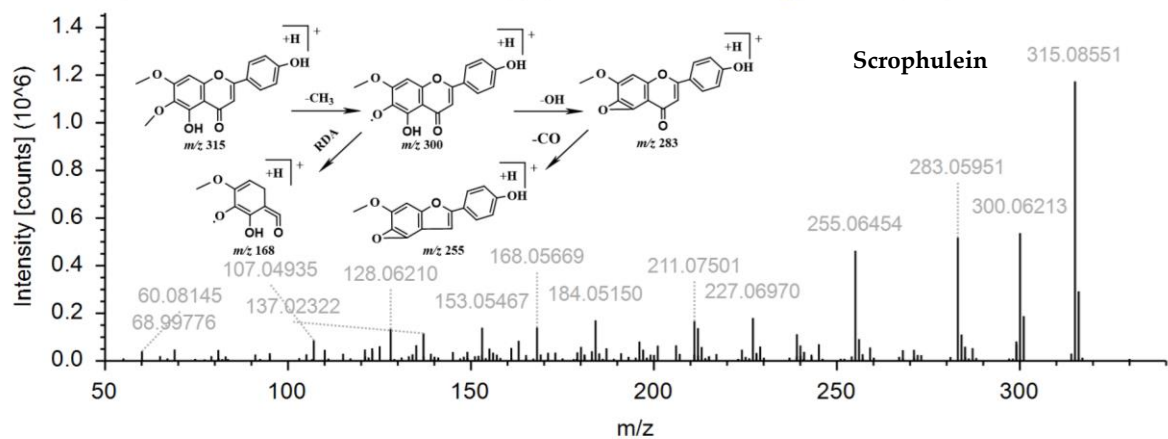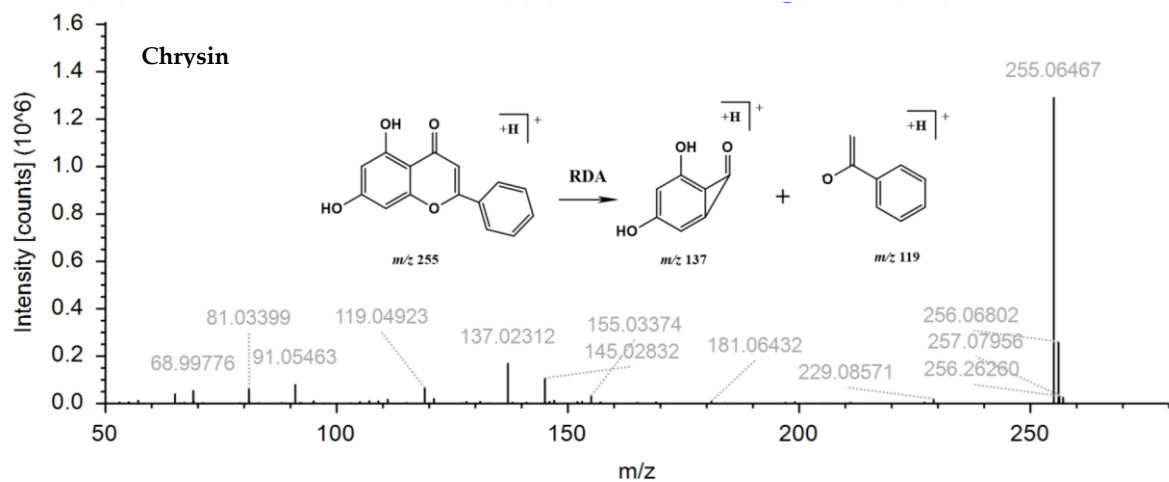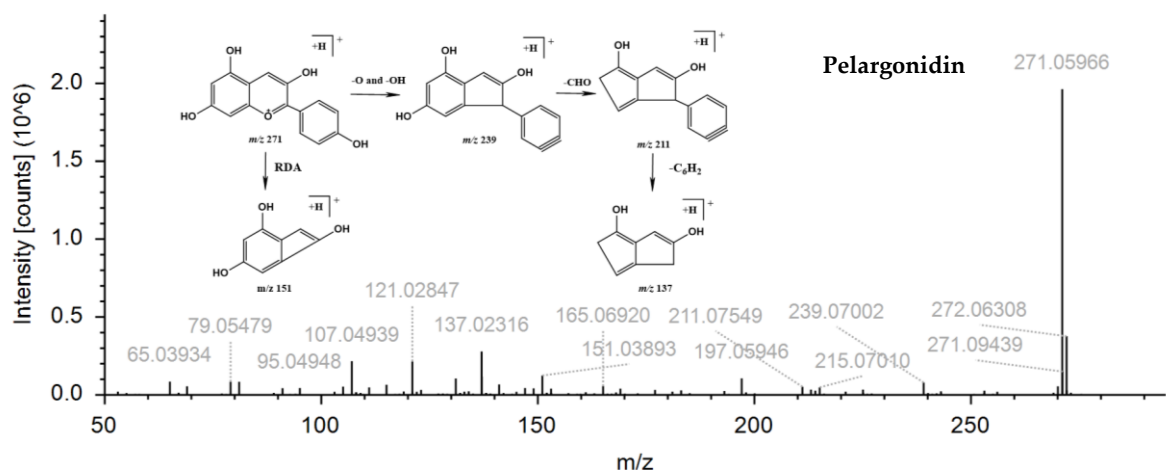

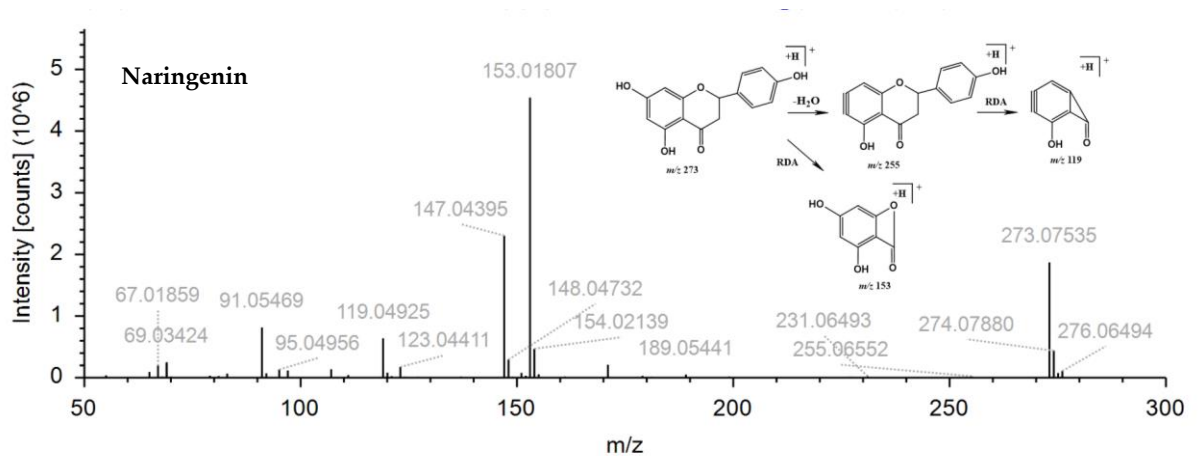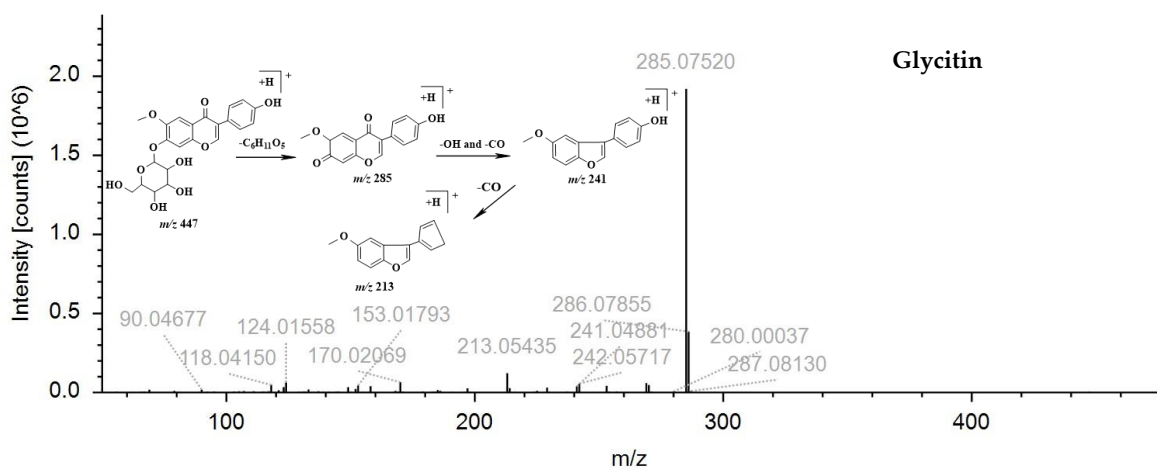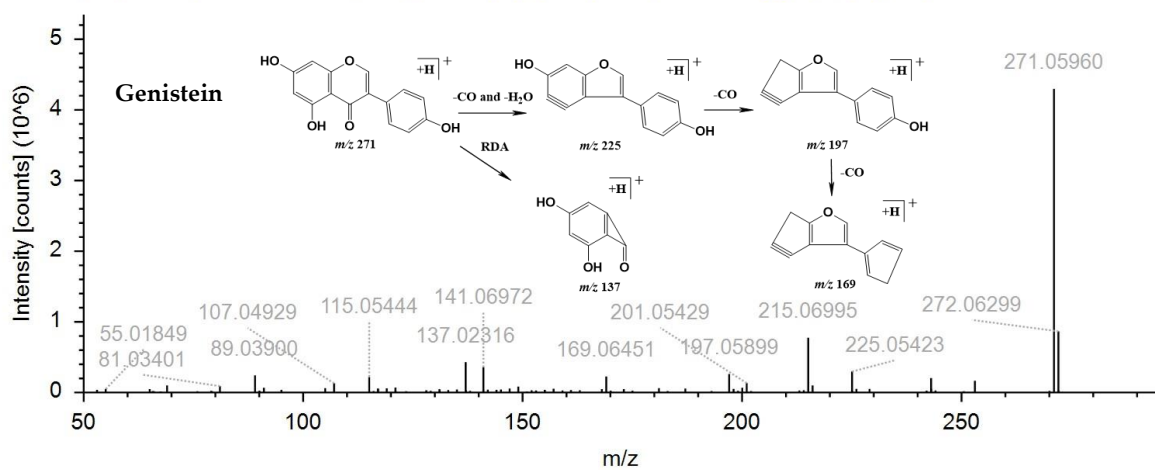

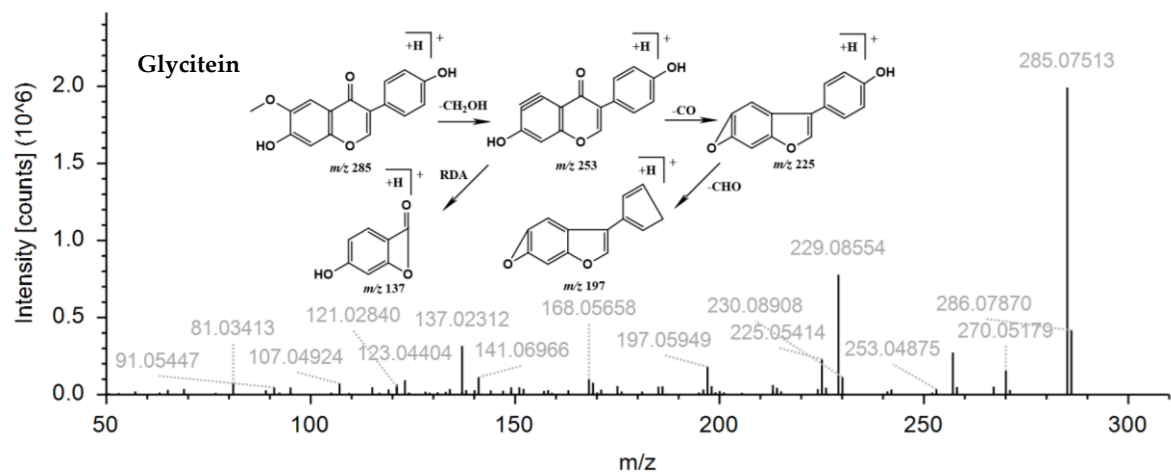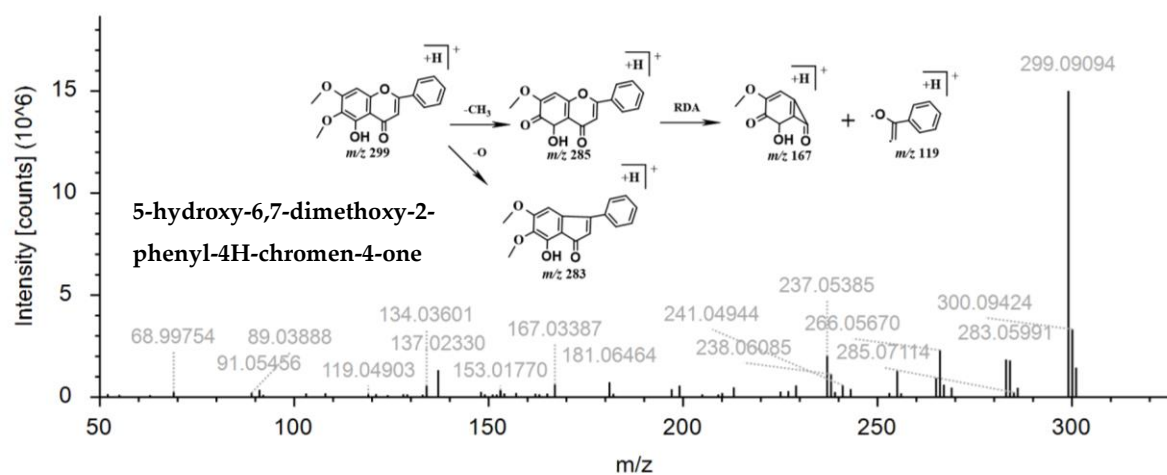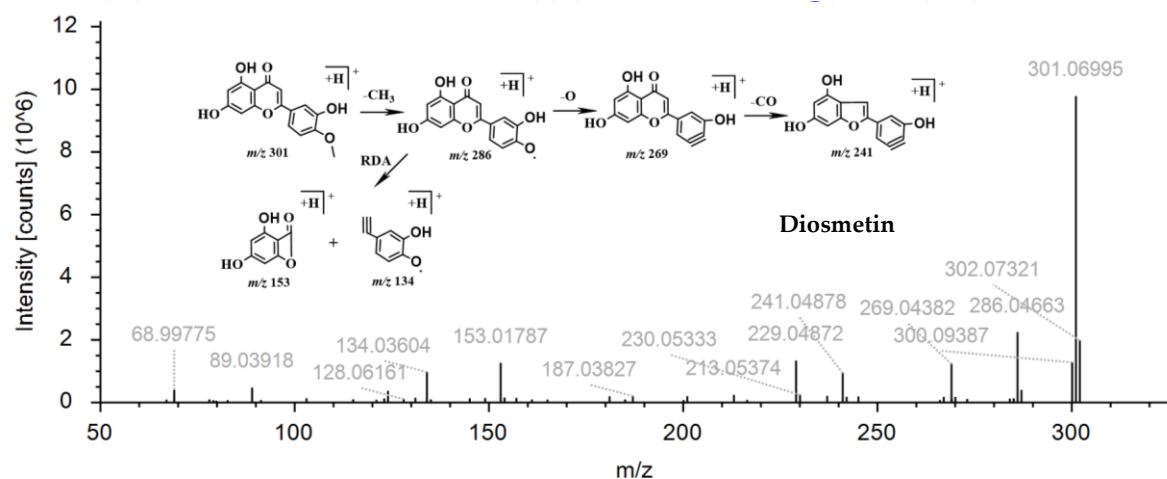

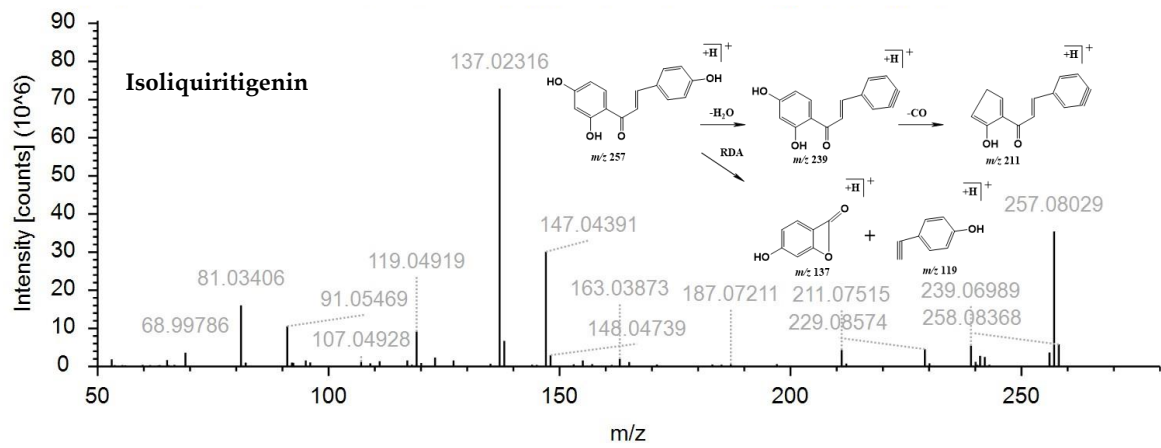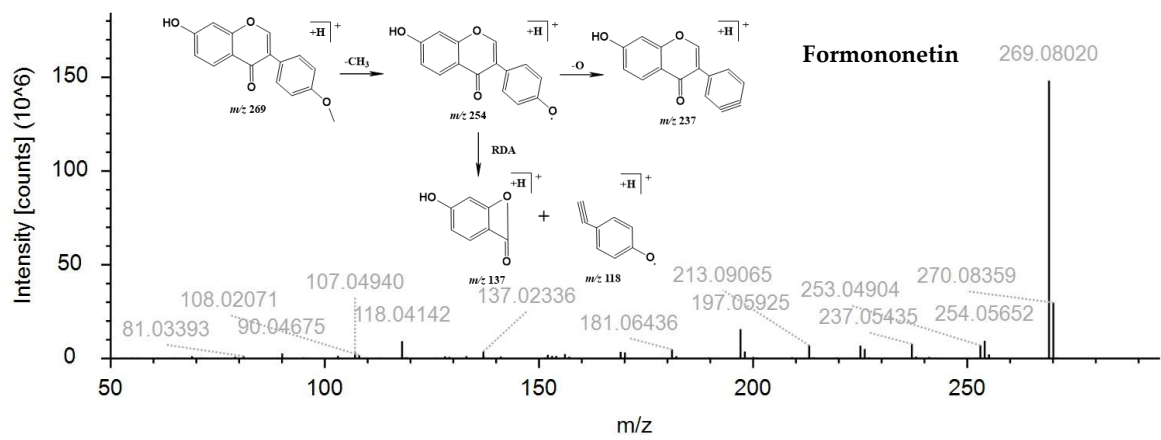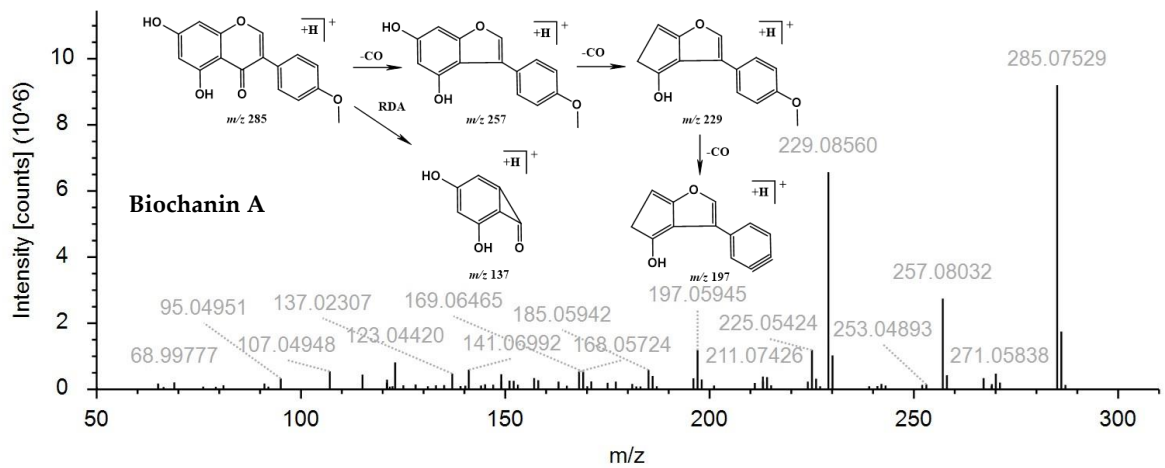

Supplement: s1 [file s1]
